# Supplementary material for: Practice of Awake Prone Positioning in Critically Ill COVID-19 Patients—Insights from the PRoAcT–COVID Study
Source: MDPI journal article supplement (doi:10.3390/jcm11236988), 2022-11-26

Supplement to:

# Practice of Awake Prone Positioning in Critically Ill COVID–19 Patients—Insights from the PRoAcT–COVID Study

Willemke Stilma <sup>1,2,\*,†</sup>, Christel M. A. Valk <sup>1,†</sup>, David M. P. van Meenen <sup>1,3</sup>, Luis Morales <sup>4,5</sup>, Daantje Remmelzwaal <sup>1</sup>, Sheila N. Myatra <sup>6</sup>, Antonio Artigas <sup>7,8</sup>, Ary Serpa Neto <sup>9,10</sup>, Frederique Paulus <sup>1,2</sup> and Marcus J. Schultz <sup>1,11,12,‡,§</sup> on behalf of the PRoAcT–COVID Collaborative Group

<sup>1</sup> Department of Intensive Care, Amsterdam University Medical Centers, Location ‘AMC’,  
1105 AZ Amsterdam, The Netherlands

<sup>2</sup> Center of Expertise Urban Vitality, Faculty of Health, Amsterdam University of Applied Sciences,  
1105 BD Amsterdam, The Netherlands

<sup>3</sup> Department of Anesthesiology, Amsterdam University Medical Centers, Location ‘AMC’,  
1105 AZ Amsterdam, The Netherlands

<sup>4</sup> Servei de Medicina Intensiva, Hospital Universitari Sant Pau, 08025 Barcelona, Spain

<sup>5</sup> Translational Research Laboratory, Institut d’Investigació i Innovació Parc Taulí I3PT, Universitat Autònoma de Barcelona Sabadell, 08208 Barcelona, Spain

<sup>6</sup> Department of Anaesthesiology, Critical Care and Pain, Tata Memorial Hospital, Homi Bhabha National Institute, Mumbai 400012, India

<sup>7</sup> Intensive Care Department, CIBER Enfermedades Respiratorias, Parc Taulí University Hospital,  
08208 Sabadell, Spain

<sup>8</sup> Autonomous University of Barcelona, 08193 Sabadell, Spain

<sup>9</sup> Australian and New Zealand Intensive Care, Research Center (ANZIC-RC), Monash University,  
Melbourne 3800, Australia

<sup>10</sup> Department of Critical Care Medicine, Hospital Israelita Albert Einstein, São Paulo 05652-900, Brazil

<sup>11</sup> Centre for Tropical Medicine and Global Health, Nuffield Department of Medicine, University of Oxford, Oxford OX3 7LG, UK

<sup>12</sup> Mahidol–Oxford Tropical Medicine Research Unit (MORU), Faculty of Tropical Medicine, Mahidol University, Bangkok 10400, Thailand

\* Correspondence: w.stilma@amsterdamumc.nl

† These authors contributed equally to this work.

‡ PRoAcT–COVID, Practice of Adjunctive Therapies in COVID-19 study.

§ Collaborative authors are presented in Appendix A.

Word counts: 311 words (abstract) and 3018 words (body of the text)

Inserts: 2 figures and 4 tables

Appendices: 1 online appendix, with 1 table and 2 figures

**Content:**

Table S1 Baseline characteristics of the matched cohort p. 3

Figure S1 A-D. Unmatched and matched analysis Kaplan Meier curve for ICU and hospital LOS p. 4

Figure S2 A-D. Unmatched and matched analysis Kaplan Meier curve for ICU and hospital mortality p. 5

**Table S1. Baseline characteristics of the matched cohort**

|                                       | <b>Overall<br/>N = 245</b> | <b>Prone Positioning<br/>N = 70</b> | <b>Standard Care<br/>N = 175</b> | <b>P</b> |
|---------------------------------------|----------------------------|-------------------------------------|----------------------------------|----------|
| Age, years (median [IQR])             | 66 [59 – 73]               | 66 [60 – 74]                        | 66 [59 – 73]                     | 0.726    |
| Male gender, N (%)                    | 172 (70.2)                 | 45 (64.3)                           | 127 (72.6)                       | 0.260    |
| BMI, kg/m <sup>2</sup> (median [IQR]) | 28.4 [25.4 – 32.3]         | 29.3 [26.0 – 32.2]                  | 27.8 [25.3 – 32.4]               | 0.348    |
| SAPS II score (median [IQR])          | 44 [33 – 54]               | 46 [36 – 54]                        | 44 [32 – 54]                     | 0.558    |
| Do-not-intubate order, N (%)          | 6 (2.4)                    | 0 (0.0)                             | 6 (3.4)                          | 0.267    |
| Comorbidities                         |                            |                                     |                                  | 0.463    |
| Arterial hypertension, N (%)          | 97 (39.6)                  | 30 (42.9)                           | 67 (38.3)                        | 0.606    |
| Cardiovascular disease, N (%)         | 60 (24.5)                  | 10 (14.3)                           | 50 (28.6)                        | 0.029    |
| Heart failure, N (%)                  | 11 (4.5)                   | 2 (2.9)                             | 9 (5.1)                          | 0.661    |
| COPD or asthma, N (%)                 | 43 (17.6)                  | 12 (17.1)                           | 31 (17.7)                        | 1.000    |
| Diabetes mellitus, N (%)              | 70 (28.6)                  | 16 (22.9)                           | 54 (30.9)                        | 0.273    |
| Chronic kidney disease, N (%)         | 21 (8.6)                   | 5 (7.1)                             | 16 (9.1)                         | 0.801    |
| Malignancy, N (%)                     | 14 (5.7)                   | 3 (4.3)                             | 11 (6.3)                         | 0.761    |
| Neuromuscular disease, N (%)          | 7 (2.9)                    | 2 (2.9)                             | 5 (2.9)                          | 1.000    |
| Obstructive sleep apnea, N (%)        | 16 (6.5)                   | 4 (5.7)                             | 12 (6.9)                         | 0.967    |

Abbreviations: BMI, Body Mass Index; COPD, Chronic obstructive pulmonary disease; SAPS, Simplified Acute Physiology Score.

Figure S1 A-D. Unmatched and matched analysis Kaplan Meier curve for ICU and hospital LOS

A: ICU discharge unmatched, B: Hospital discharge unmatched, C: ICU discharge matched, D: Hospital discharge matched

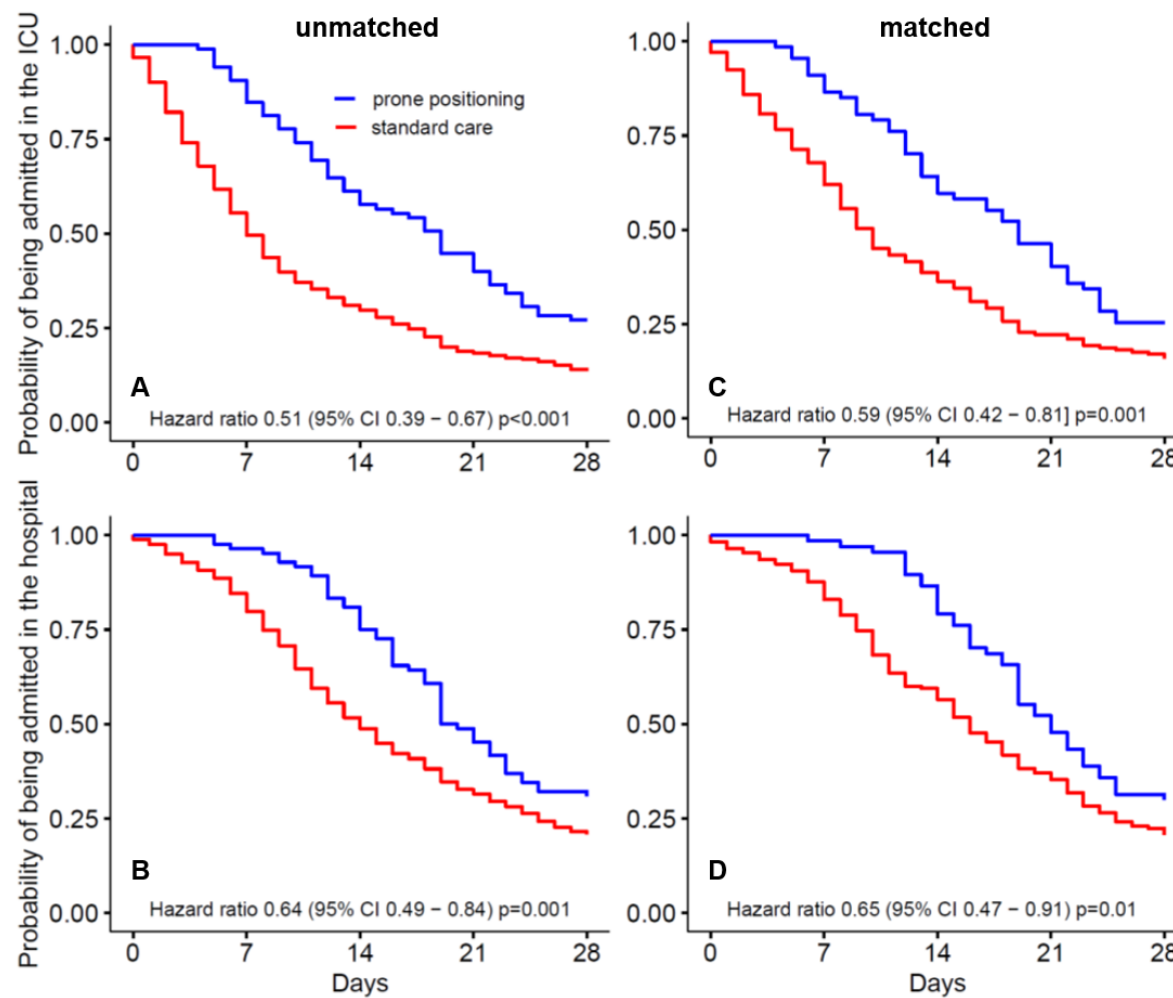

Figure S2 A-D. Unmatched and matched analysis Kaplan Meier curve for ICU and hospital mortality

A: ICU mortality unmatched, B: Hospital mortality unmatched, C: ICU mortality Matched, D: Hospital mortality Matched

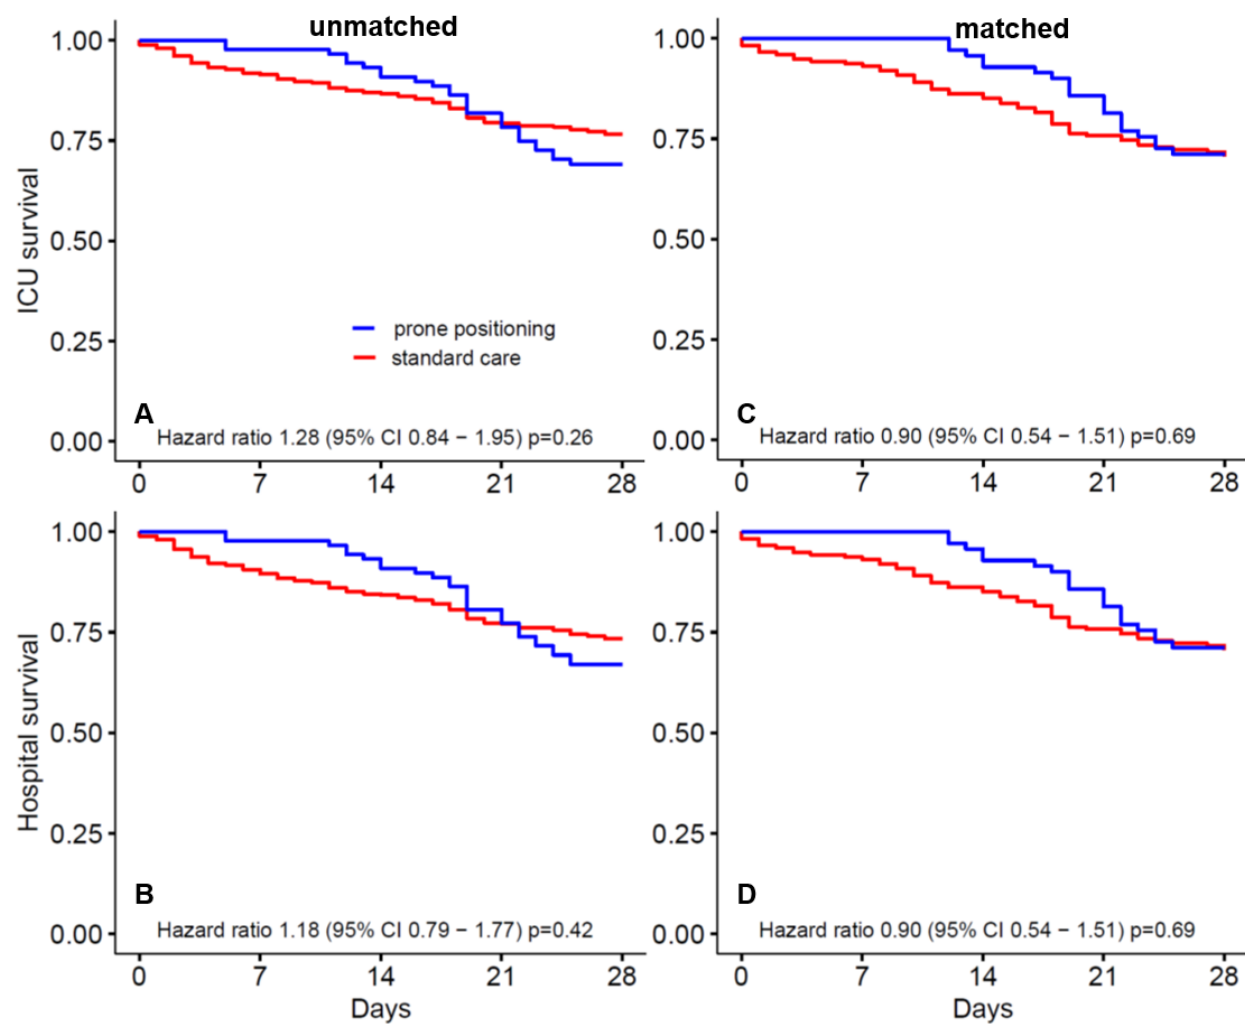

Supplement: s1 [file s1]
